# Supplementary material for: Acceptability and Feasibility of a Mindfulness Intervention Delivered via Videoconferencing for People With Parkinson’s
Source: PubMed Central journal article supplement (PMC8678660; doi:10.1177/0891988720988901), 2021-01-28
Supplement: sj-pdf-1-jgp-10.1177_0891988720988901.pdf [file sj-pdf-1-jgp-10.1177_0891988720988901.pdf]

Supplementary table of unimputed data (sensitivity analysis). Estimated post-therapy group differences (treatment effects) for primary, secondary outcomes

|                       |                   | Mindfulness<br>(n=22) |             | WLC<br>(n=27) |             |            |                           |
|-----------------------|-------------------|-----------------------|-------------|---------------|-------------|------------|---------------------------|
|                       |                   | Mean (SD)             | CI<br>LB-UB | Mean (SD)     | CI<br>LB-UB | Mean* diff | Effect size*<br>Cohen's d |
| Anxiety               | baseline          | 8.18 (3.86)           | 6.54-9.82   | 7.77 (3.76)   | 6.30-9.25   | 0.41       | 0.11                      |
|                       | mid-intervention  | 6.22 (4.37)           | 4.44-8.01   | 6.29 (3.98)   | 4.68-7.91   | -0.07      | 0.02                      |
|                       | post-intervention | 6.77 (3.49)           | 5.17-8.37   | 6.11 (3.92)   | 4.66-7.55   | 0.66       | 0.18                      |
|                       | follow-up         | 6.00 (3.66)           | 4.36-7.64   | 6.29 (3.94)   | 4.82-7.77   | -0.29      | 0.08                      |
| Depression            | baseline          | 7.09 (3.11)           | 5.74-8.44   | 5.67 (3.16)   | 4.45-6.88   | 1.42       | 0.45                      |
|                       | mid-intervention  | 5.95 (2.98)           | 4.67-7.24   | 5.00 (3.01)   | 3.89-6.16   | 0.95       | 0.32                      |
|                       | post-intervention | 5.00 (2.63)           | 3.70-6.30   | 5.15 (3.31)   | 3.97-6.32   | 0.53       | 0.05                      |
|                       | follow-up         | 5.68 (3.44)           | 4.26-7.10   | 5.29 (3.20)   | 4.01-6.58   | 0.39       | 0.12                      |
| Pain                  | Baseline          | 3.44 (1.90)           | 2.51-4.37   | 3.21 (2.35)   | 2.37-4.05   | 0.23       | 0.11                      |
|                       | mid-intervention  | 3.21 (2.02)           | 2.25-4.15   | 3.37 (2.34)   | 2.52-4.23   | -0.16      | 0.07                      |
|                       | post-intervention | 2.93 (2.22)           | 2.02-3.85   | 3.04 (2.13)   | 2.22-3.86   | -0.11      | 0.05                      |
|                       | follow-up         | 3.66 (2.11)           | 2.68-4.64   | 3.40 (2.42)   | 2.52-4.29   | 0.26       | 0.11                      |
| Fatigue               | Baseline          | 3.89 (1.24)           | 3.28-4.51   | 3.95 (1.55)   | 3.95-4.49   | -0.06      | 0.04                      |
|                       | mid-intervention  | 3.98 (1.36)           | 3.33-4.63   | 3.57 (1.63)   | 2.98-4.16   | 0.41       | 0.27                      |
|                       | post-intervention | 4.03 (1.17)           | 3.42-4.64   | 3.87 (1.59)   | 3.33-4.43   | 0.16       | 0.11                      |
|                       | follow-up         | 4.28 (1.38)           | 3.62-4.95   | 3.99 (1.67)   | 3.39-4.59   | 0.29       | 0.19                      |
| Insomnia              | Baseline          | 11.04 (5.05)          | 8.49-13.60  | 9.48 (6.58)   | 7.18-11.78  | 1.56       | 0.26                      |
|                       | mid-intervention  | 16.45 (6.32)          | 13.68-19.23 | 16.00 (6.57)  | 13.50-18.50 | 0.45       | 0.07                      |
|                       | post-intervention | 16.50 (5.27)          | 13.92-19.08 | 15.85 (6.56)  | 13.52-18.18 | 0.65       | 0.11                      |
|                       | follow-up         | 17.27 (5.17)          | 14.62-19.92 | 16.85 (6.89)  | 14.46-19.24 | 0.42       | 0.07                      |
| Impact of Parkinson's | Baseline          | 2.00 (0.55)           | 1.86-2.34   | 2.15 (0.66)   | 1.89-2.37   | -0.15      | 0.25                      |
|                       | Mid-intervention  | 1.95 (0.67)           | 1.82-2.32   | 2.04 (0.65)   | 1.79-2.30   | -0.09      | 0.14                      |
|                       | post-intervention | 1.86 (0.73)           | 1.73-2.27   | 2.11 (0.70)   | 1.83-2.37   | -0.25      | 0.35                      |
|                       | follow-up         | 1.95 (0.74)           | 1.73-2.34   | 2.26 (0.90)   | 1.93-2.54   | -0.31      | 0.38                      |

*\*Mean difference and effect sizes reflect between groups differences*
